# Supplementary material
Source: PubMed Central journal article supplement (PMC7273333)
Supplement: euz360_supplementary_data.pdf [file euz360_supplementary_data.pdf]

Kloosterman et al . Atrial Fibrillation without Traditional Risk Factors: RE-LY AF registry analysis

## SUPPLEMENTARY MATERIALS

### Supplementary Table 1. Secondary precipitants for AF

|                                                                |    |
|----------------------------------------------------------------|----|
| Acute coronary syndrome / arrest                               | 13 |
| Pericarditis / Pericardial effusion<br>(HIV and Tuberculosis*) | 6  |
| Acute pulmonary oedema                                         | 2  |
| Cerebrovascular accident                                       | 4  |
| Aortic rupture                                                 | 1  |
| Heart failure                                                  | 14 |
| Hypertension                                                   | 1  |
| ICD shock                                                      | 1  |
| Myocarditis                                                    | 1  |
| Rheumatic heart disease                                        | 3  |

HIV, human immunodeficiency virus; ICD, implantable cardiac defibrillator. \*HIV and Tuberculosis associated pericarditis occurred in Africa.

**Supplementary Table 2.1 Emergency department management in patients without and with traditional risk factors**

|                                          | Without traditional risk factors | With traditional risk factors | P-value |
|------------------------------------------|----------------------------------|-------------------------------|---------|
| <b>ED management</b>                     |                                  |                               |         |
| Cardioversion in ED (%)                  |                                  |                               |         |
| ▪ Electrical                             | 101 (12.7)                       | 144 (6.0)                     | <0.001* |
| ▪ Chemical                               | 179 (22.5)                       | 267 (11.2)                    |         |
| ▪ Spontaneous                            | 122 (15.3)                       | 186 (7.8)                     |         |
| ▪ None                                   | 394 (49.5)                       | 1791 (75.0)                   |         |
| Patient in AF at ED discharge (%)        | 432 (54.3)                       | 1842 (77.1)                   | <0.001  |
| <b>Medication after ED discharge (%)</b> |                                  |                               |         |
| Acetylsalicylic acid                     | 353 (44.3)                       | 968 (40.5)                    | 0.059   |
| Clopidogrel                              | 33 (4.1)                         | 188 (7.9)                     | <0.001  |
| Warfarin                                 | 131 (16.5)                       | 911 (38.1)                    | <0.001  |
| Other vitamin K-antagonist†              | 84 (10.6)                        | 432 (18.1)                    | <0.001  |
| Diuretics                                | 87 (10.9)                        | 1321 (55.3)                   | <0.001  |
| ACE-inhibitor                            | 58 (7.3)                         | 789 (33.0)                    | <0.001  |
| ARB                                      | 26 (3.3)                         | 275 (11.5)                    | <0.001  |
| Beta-blocker                             | 372 (46.7)                       | 1347 (56.4)                   | <0.001  |
| Verapamil/diltiazem                      | 99 (12.4)                        | 367 (15.4)                    | 0.043   |
| Digoxin                                  | 101 (12.7)                       | 955 (40.0)                    | <0.001  |
| Amiodarone                               | 97 (12.2)                        | 383 (16.0)                    | 0.009   |
| Flecainide                               | 33 (4.1)                         | 43 (1.8)                      | <0.001  |
| Propafenone                              | 53 (6.7)                         | 64 (2.7)                      | <0.001  |
| Sotalol                                  | 36 (4.5)                         | 81 (3.4)                      | 0.142   |
| Statin                                   | 79 (9.9)                         | 574 (24.0)                    | <0.001  |

\* An overall p-value for all groups (Type 3 test). † Acenocoumarol or Phenprocoumon. ACE-inhibitor denotes angiotensin-converting-enzyme inhibitor; ARB, angiotensin receptor blocker; ED, emergency department.

**Supplementary Table 2.2 Emergency department management of patients without traditional risk factors in different regions**

|                                          | Patients without traditional risk factors | North America, Western Europe, and Australia | South America | Eastern Europe | Middle East | Africa    | India      | China      | Southeast Asia | P-value† |
|------------------------------------------|-------------------------------------------|----------------------------------------------|---------------|----------------|-------------|-----------|------------|------------|----------------|----------|
| <b>ED management</b>                     |                                           |                                              |               |                |             |           |            |            |                |          |
| Cardioversion in ED (%)                  |                                           |                                              |               |                |             |           |            |            |                |          |
| ▪ Electrical                             | 101 (12.7)                                | 66 (23.1)                                    | 10 (19.2)     | 9 (24.3)       | 7 (5.3)*    | 4 (11.1)  | 3 (3.8)*   | 1 (1.1)*   | 1 (1.2)*       | <0.001‡  |
| ▪ Chemical                               | 179 (22.5)                                | 37 (12.9)                                    | 24 (46.2)*    | 4 (10.8)       | 47 (35.6)*  | 3 (8.3)   | 15 (18.8)  | 34 (37.8)* | 15 (18.1)      | <0.001   |
| ▪ Spontaneous                            | 122 (15.3)                                | 53 (18.5)                                    | 5 (9.6)       | 7 (18.9)       | 18 (13.6)   | 9 (25.0)  | 2 (2.5)*   | 11 (12.2)  | 17 (20.5)      | 0.007    |
| ▪ None                                   | 394 (49.5)                                | 130 (45.5)                                   | 13 (25.0)     | 17 (45.9)      | 60 (45.5)   | 20 (55.6) | 60 (75.0)* | 44 (48.9)  | 50 (60.2)      | <0.001   |
| Patient in AF at ED discharge (%)        | 432 (54.3)                                | 139 (48.6)                                   | 28 (53.8)     | 20 (54.1)      | 68 (51.5)   | 22 (61.1) | 61 (76.3)* | 42 (46.7)  | 52 (62.7)      | <0.001   |
| <b>Medication after ED discharge (%)</b> |                                           |                                              |               |                |             |           |            |            |                |          |
| Acetylsalicylic acid                     | 353 (44.3)                                | 126 (44.1)                                   | 29 (55.8)     | 9 (24.3)       | 81 (61.4)*  | 10 (27.8) | 27 (33.8)  | 37 (41.1)  | 34 (41.0)      | <0.001   |
| Clopidogrel                              | 33 (4.1)                                  | 6 (2.1)                                      | 1 (1.9)       | 0 (-)          | 5 (3.8)     | 0 (-)     | 13 (16.3)* | 3 (3.3)    | 5 (6.0)        | <0.001‡  |
| Warfarin                                 | 131 (16.5)                                | 56 (19.6)                                    | 6 (11.5)      | 12 (32.4)      | 25 (18.9)   | 3 (8.3)   | 7 (8.8)    | 8 (8.9)    | 14 (16.9)      | 0.007    |
| Other vitamin K-antagonist °             | 84 (10.6)                                 | 42 (14.7)                                    | 2 (3.8)       | 13 (35.1)*     | 4 (3.0)*    | 4 (11.1)  | 14 (17.5)  | 1 (1.1)*   | 4 (4.8)        | <0.001‡  |
| Diuretics                                | 87 (10.9)                                 | 17 (5.9)                                     | 7 (13.5)      | 3 (8.1)        | 9 (6.8)     | 6 (16.7)  | 32 (40.0)* | 7 (7.8)    | 6 (7.2)        | <0.001‡  |
| ACE-inhibitor                            | 58 (7.3)                                  | 22 (7.7)                                     | 4 (7.7)       | 4 (10.8)       | 10 (7.6)    | 2 (5.6)   | 10 (12.5)  | 3 (3.3)    | 3 (3.6)        | 0.329‡   |
| ARB                                      | 26 (3.3)                                  | 3 (1.0)                                      | 2 (3.8)       | 1 (2.7)        | 6 (4.5)     | 0 (-)     | 3 (3.8)    | 5 (5.6)    | 6 (7.2)        | 0.045‡   |
| Beta-blocker                             | 372 (46.7)                                | 139 (48.6)                                   | 16 (30.8)     | 24 (64.9)      | 87 (65.9)*  | 13 (36.1) | 32 (40.0)  | 36 (40.0)  | 25 (30.1)*     | <0.001   |
| Verapamil/diltiazem                      | 99 (12.4)                                 | 55 (19.2)                                    | 3 (5.8)       | 0 (-)*         | 6 (4.5)*    | 2 (5.6)   | 21 (26.3)  | 3 (3.3)*   | 9 (10.8)       | <0.001‡  |
| Digoxin                                  | 101 (12.7)                                | 19 (6.6)                                     | 5 (9.6)       | 4 (10.8)       | 13 (9.8)    | 9 (25.0)* | 30 (37.5)* | 9 (10.0)   | 12 (14.5)      | <0.001‡  |
| Amiodarone                               | 97 (12.2)                                 | 11 (3.8)                                     | 18 (34.6)*    | 7 (18.9)*      | 9 (6.8)     | 6 (16.7)  | 19 (23.8)* | 10 (11.1)  | 17 (20.5)*     | <0.001‡  |
| Flecainide                               | 33 (4.1)                                  | 27 (9.4)                                     | 0 (-)         | 0 (-)          | 0 (-)*      | 3 (8.3)   | 0 (-)*     | 0 (-)*     | 3 (3.6)        | <0.001‡  |

|             | <b>Patients without traditional risk factors</b> | <b>North America, Western Europe, and Australia</b> | <b>South America</b> | <b>Eastern Europe</b> | <b>Middle East</b> | <b>Africa</b> | <b>India</b> | <b>China</b> | <b>Southeast Asia</b> | <b>P-value†</b> |
|-------------|--------------------------------------------------|-----------------------------------------------------|----------------------|-----------------------|--------------------|---------------|--------------|--------------|-----------------------|-----------------|
| Propafenone | 53 (6.7)                                         | 12 (4.2)                                            | 6 (11.5)             | 7 (18.9)*             | 15 (11.4)          | 0 (-)         | 0 (-)        | 2 (2.2)      | 11 (13.3)*            | <0.001‡         |
| Sotalol     | 36 (4.5)                                         | 24 (8.4)                                            | 1 (1.9)              | 4 (10.8)              | 2 (1.5)            | 4 (11.1)      | 0 (-)        | 0 (-)*       | 1 (1.2)               | <0.001‡         |
| Statin      | 79 (9.9)                                         | 26 (9.1)                                            | 5 (9.6)              | 10 (27.0)*            | 14 (10.6)          | 0 (-)         | 11 (13.8)    | 6 (6.7)      | 7 (8.4)               | 0.016‡          |

\* Significantly different from North America/Western Europe, P<0.005

° Acenocoumarol or Phenprocoumon

† P-value is from the test of null hypothesis that there is no difference among regions, using ANOVA test for mean age, Kruskal Wallis test for median age and Chi-square test or Monte Carlo estimates of Fisher's exact test for categorical variables

‡ Exact P-value was estimated by Monte Carlo simulation with 100,000 samples

ACE-inhibitor denotes angiotensin-converting-enzyme inhibitor; ARB, angiotensin receptor blocker; ED, emergency department.

**Supplementary Table 3.1 AF presence, treatment and medication during 1-year follow-up in patients without and with traditional risk factors**

|                                   | <b>Without<br/>traditional<br/>risk factors</b> | <b>With<br/>traditional<br/>risk factors</b> | <b>P-value</b> |
|-----------------------------------|-------------------------------------------------|----------------------------------------------|----------------|
| AF recurrence (%)                 | 224 (28.1)                                      | 499 (20.9)                                   | <0.001         |
| AF persistence (%)                | 170 (21.4)                                      | 1157 (48.5)                                  | <0.001         |
| Anti-arrhythmic drugs (%)         | 213 (26.8)                                      | 507 (21.2)                                   | 0.002          |
| Rate control drugs (%)            | 374 (47.0)                                      | 1742 (72.9)                                  | <0.001         |
| Acetylsalicylic acid (%)          | 308 (38.7)                                      | 873 (36.6)                                   | 0.338          |
| Anticoagulation use: Warfarin (%) | 111 (13.9)                                      | 856 (35.8)                                   | <0.001         |
| Anticoagulation use: Other (%)    | 52 (6.5)                                        | 313 (13.1)                                   | <0.001         |
| Evaluated by a specialist (%)     | 515 (64.7)                                      | 1712 (71.7)                                  | <0.001         |
| ▪ Cardiologist                    | 409 (51.4)                                      | 1473 (61.7)                                  | <0.001         |
| ▪ Electrophysiologist             | 92 (11.6)                                       | 172 (7.2)                                    | <0.001         |
| ▪ Internist                       | 28 (3.5)                                        | 123 (5.2)                                    | 0.167          |
| Procedures since enrolment (%)    |                                                 |                                              |                |
| ▪ Cardioversion                   | 107 (13.4)                                      | 257 (10.8)                                   | 0.040          |
| ▪ AF ablation                     | 51 (6.4)                                        | 101 (4.2)                                    | 0.013          |
| ▪ AV node ablation                | 6 (0.8)                                         | 14 (0.6)                                     | 0.604          |
| ▪ PM or ICD                       | 10 (1.3)                                        | 53 (2.2)                                     | 0.091          |

AF denotes atrial fibrillation; AV, atrioventricular; ICD, implantable cardiac defibrillator; PM, pacemaker.

**Supplementary Table 3.2 AF presence, treatment and medication during 1-year follow-up of patients without traditional risk factors in different regions**

|                                   | Patients without traditional risk factors | North America, Western Europe, and Australia | South America | Eastern Europe | Middle East | Africa    | India       | China      | Southeast Asia | P-value† |
|-----------------------------------|-------------------------------------------|----------------------------------------------|---------------|----------------|-------------|-----------|-------------|------------|----------------|----------|
| AF recurrence (%)                 | 224 (29.0)                                | 122 (43.4)                                   | 9 (18.4)*     | 16 (43.2)      | 12 (9.3)*   | 10 (29.4) | 8 (10.8)*   | 28 (32.2)  | 19 (23.5)*     | <0.001   |
| AF persistence (%)                | 170 (22.0)                                | 41 (14.6)                                    | 9 (18.4)      | 9 (24.3)       | 23 (17.8)   | 10 (29.4) | 31 (41.9)*  | 28 (32.2)* | 19 (23.5)      | <0.001   |
| Anti-arrhythmic drugs (%)         | 213 (27.5)                                | 102 (36.0)                                   | 19 (38.8)     | 19 (51.4)      | 6 (4.7)*    | 6 (17.6)  | 17 (23.0)   | 16 (18.4)* | 28 (34.6)      | <0.001   |
| Rate control drugs (%)            | 374 (48.4)                                | 146 (51.8)                                   | 13 (26.5)*    | 17 (45.9)      | 73 (56.6)   | 14 (41.2) | 43 (58.1)   | 31 (35.6)  | 37 (45.7)      | 0.001    |
| Acetylsalicylic acid (%)          | 308 (39.8)                                | 125 (44.3)                                   | 14 (28.6)     | 10 (27.0)      | 70 (54.3)   | 10 (29.4) | 20 (27.0)   | 29 (33.3)  | 30 (37.0)      | <0.001   |
| Anticoagulation use: Warfarin (%) | 111 (14.4)                                | 47 (16.7)                                    | 2 (4.1)       | 5 (13.5)       | 18 (14.0)   | 4 (11.8)  | 8 (10.8)    | 6 (6.9)    | 21 (25.9)      | 0.008‡   |
| Anticoagulation use: Other (%)    | 52 (6.7)                                  | 29 (10.3)                                    | 2 (4.1)       | 7 (18.9)       | 3 (2.3)     | 0 (-)     | 7 (9.5)     | 1 (1.1)    | 3 (3.7)        | <0.001‡  |
| Evaluated by a specialist (%)     | 515 (64.7)                                | 218 (76.2)                                   | 37 (71.2)     | 26 (70.3)      | 74 (56.1)*  | 27 (75.0) | 29 (36.3)*  | 42 (46.7)* | 62 (74.7)      | <0.001   |
| ▪ Cardiologist                    | 409 (79.4)                                | 166 (76.1)                                   | 23 (62.2)     | 20 (76.9)      | 66 (89.2)   | 23 (85.2) | 29 (100.0)* | 34 (81.0)  | 48 (77.4)      | 0.004    |
| ▪ Electrophysiologist             | 92 (17.9)                                 | 62 (28.4)                                    | 11 (29.7)     | 1 (3.8)        | 0 (-)*      | 0 (-)*    | 0 (-)*      | 4 (9.5)    | 14 (22.6)      | <0.001‡  |
| ▪ Internist                       | 28 (5.4)                                  | 5 (2.3)                                      | 2 (5.4)       | 5 (19.2)*      | 8 (10.8)    | 4 (14.8)  | 0 (-)       | 4 (9.5)    | 0 (-)          | <0.001‡  |
| Procedures since enrolment (%)    |                                           |                                              |               |                |             |           |             |            |                |          |
| ▪ Cardioversion                   | 107 (13.4)                                | 61 (21.3)                                    | 6 (11.5)      | 11 (29.7)      | 11 (8.3)*   | 4 (11.1)  | 0 (-)*      | 6 (6.7)*   | 8 (9.6)        | <0.001‡  |
| ▪ AF ablation                     | 51 (6.4)                                  | 36 (12.6)                                    | 4 (7.7)       | 4 (10.8)       | 1 (0.8)*    | 0 (-)     | 1 (1.3)*    | 1 (1.1)*   | 4 (4.8)        | <0.001‡  |
| ▪ AV node ablation                | 6 (0.8)                                   | 5 (1.7)                                      | 1 (1.9)       | 0 (-)          | 0 (-)       | 0 (-)     | 0 (-)       | 0 (-)      | 0 (-)          | 0.465‡   |
| ▪ PM or ICD                       | 10 (1.3)                                  | 4 (1.4)                                      | 2 (3.8)       | 0 (-)          | 2 (1.5)     | 0 (-)     | 0 (-)       | 2 (2.2)    | 0 (-)          | 0.552‡   |

\* Significantly different from North America/Western Europe, p<0.005

† P-value is from the test of null hypothesis that there is no difference among regions, using ANOVA test for mean age, Kruskal Wallis test for median age and Chi-square test or Monte Carlo estimates of Fisher's exact test for categorical variables

‡ Exact P-value was estimated by Monte Carlo simulation with 100,000 samples

AF denotes atrial fibrillation; ASA, acetylsalicylic acid; AV, atrioventricular; ICD, implantable cardiac defibrillator; PM, pacemaker.

**Supplementary Table 4. Outcomes of patients without traditional risk factors by region**

|                                      | Patients without traditional risk factors | North America, Western Europe, and Australia | South America | Eastern Europe | Middle East | Africa   | India   | China     | Southeast Asia | P-value† |
|--------------------------------------|-------------------------------------------|----------------------------------------------|---------------|----------------|-------------|----------|---------|-----------|----------------|----------|
| <b>MACCE (%)</b>                     | 18 (2.3)                                  | 3 (1.0)                                      | 3 (5.8)       | 0 (-)          | 2 (1.5)     | 1 (2.8)  | 2 (2.5) | 3 (3.3)   | 4 (4.8)        | 0.160‡   |
| ▪ Death                              | 13 (1.6)                                  | 2 (0.7)                                      | 3 (5.8)       | 0 (-)          | 2 (1.5)     | 1 (2.8)  | 2 (2.5) | 2 (2.2)   | 1 (1.2)        | 0.189‡   |
| ▪ Stroke                             | 5 (0.6)                                   | 1 (0.3)                                      | 0 (-)         | 0 (-)          | 0 (-)       | 0 (-)    | 0 (-)   | 1 (1.1)   | 3 (3.6)        | 0.133‡   |
| ▪ Systemic embolism                  | 0 (-)                                     | 0 (-)                                        | 0 (-)         | 0 (-)          | 0 (-)       | 0 (-)    | 0 (-)   | 0 (-)     | 0 (-)          | -        |
| ▪ Major bleeding                     | 3 (0.4)                                   | 1 (0.3)                                      | 0 (-)         | 0 (-)          | 0 (-)       | 0 (-)    | 0 (-)   | 0 (-)     | 2 (2.4)        | 0.365‡   |
| <b>Hospitalization (%)</b>           | 146 (18.3)                                | 80 (28.0)                                    | 6 (11.5)      | 9 (24.3)       | 11 (8.3)*   | 6 (16.7) | 0 (-)*  | 17 (18.9) | 17 (20.5)      | <0.001   |
| ▪ For heart failure                  | 7 (0.9)                                   | 1 (0.3)                                      | 0 (-)         | 0 (-)          | 1 (0.8)     | 3 (8.3)* | 0 (-)   | 1 (1.1)   | 1 (1.2)        | 0.026‡   |
| ▪ For MI                             | 2 (0.3)                                   | 1 (0.3)                                      | 0 (-)         | 0 (-)          | 0 (-)       | 1 (2.8)  | 0 (-)   | 0 (-)     | 0 (-)          | 0.338‡   |
| ▪ For AF                             | 141 (17.7)                                | 78 (27.3)                                    | 6 (11.5)      | 9 (24.3)       | 10 (7.6)*   | 4 (11.1) | 0 (-)*  | 17 (18.9) | 17 (20.5)      | <0.001   |
| No. of hosp. in last year, mean (SD) | 1.2±1.3                                   | 2.0±1.4                                      | 1.0±0.0*      | 1.6±1.3        | 1.6±0.7     | 2.8±1.0  | -       | 1.9±1.3   | 1.3±0.8        | <0.001   |

\* Significantly different from North America/Western Europe,  $p < 0.005$

† P-value is from the test of null hypothesis that there is no difference among regions, using ANOVA test for mean age, Kruskal Wallis test for median age and Chi-square test or Monte Carlo estimates of Fisher's exact test for categorical variables

‡ Exact P-value was estimated by Monte Carlo simulation with 100,000 samples.

AF denotes atrial fibrillation; MI, myocardial infarction; MACCE, major adverse cardiovascular or cerebral event including death, stroke, systemic embolism or major bleeding; SD, standard deviation.
